# Supplementary material for: Using Microarrays to Facilitate Positional Cloning: Identification of Tomosyn as an Inhibitor of Neurosecretion
Source: PubMed Central journal article supplement (PMC1183521; doi:10.1371/journal.pgen.0010002), 2005-07-25
Supplement: pgen.0010002.sg002.pdf [file pgen.0010002.sg002.pdf]

# Supplemental Figure 2

TOM-1 : MDRAKKKFASAIDGLRSLHNRT-----EINVDEKIQSEHCRFTRVVRHGLPEDPRCFAYDPVQRLIAI : 63  
 hTomosyn : --MRKFNIRKVL DGLTAGSSSSASQQQQQ--HPPGNREPEIQETLQSEHFQ LCKTVRHGFYQPSALAFDPVQKILAV : 74  
 rTomosynS : --MRKFNIRKVL DGLTAGSSSSASQQQQQ--HPPGNREPEIQETLQSEHFQ LCKTVRHGFYQPSALAFDPVQKILAV : 75

TOM-1 : GTGRGHIRIIGDAGVDYLLKHESGEPV LHMQLVNEGGLITSCGTDSIHLWNYRQKTAEIVHTVQLSKESVSCIHL P : 140  
 hTomosyn : GTOTGALRLFG RPGVECYCQHDSGAAV IQLQFLINEGALVSALADDTLHLWNL RQKRPAILHSLKFCRERVTFC HLP : 151  
 rTomosynS : GTOTGALRLFG RPGVECYCQHDSGAAV IQLQFLINEGALVSALADDTLHLWNL RQKRPAILHSLKFCRERVTFC HLP : 152

TOM-1 : VAGKWLFIGTDKGNVYFLCLNSFL LSPYVINWKAIDLS CRVHPGPVRLAVSPAENTKLLIVVDKGI VVQWNLGTR : 217  
 hTomosyn : FQSKWLYVGT ERGNIHIVNVESF LSGYVI MWKAI ELSKSHPGPVVHISDNPMDEGKLLIGFESGTVV L WDLKSK : 228  
 rTomosynS : FQSKWLYVGT ERGNIHIVNVESF LSGYVI MWKAI ELSKSHPGPVVHISDNPMDEGKLLIGFESGTVV L WDLKSK : 229

TOM-1 : EVD-RYPLDPPIKSVNWHFDGRO I L TGNVDGSISLYNHKKS TEA IQRTPHGS G-----PCRPIQQVEWKHMSE : 285  
 hTomosyn : KADYRYTYDEA IHSVAWHHEGKQ FICSHSDGTLTIWNVRS PAKPVQIT ITPHGKQLKDGKKPEPCKPILKVEFKTTRS : 305  
 rTomosynS : KADYRYTYDEA IHSVAWHHEGKQ FICSHSDGTLTIWNVRS PTPKPVQIT ITPHGKQLKDGKKPEPCKPILKVEFKTTRS : 306

TOM-1 : TESIIIMFSGGMPTDDGLMPALT I LKGGKSATVLEMDWPI IQFIPLNQN IWNNSIPQCEH SVAVLLKHDFMVLDLNQN : 362  
 hTomosyn : GEPFII LSGGLSYD TVGRRPCLTVMH -GKSTAVLEMDYS IVDFTLTCETPYPNDFQEPYAVVV LLEKDLVLIDL AQN : 381  
 rTomosynS : GEPFII LSGGLSYD TVGRRPCLTVMH -GKSTAVLEMDYS IVDFTLTCETPYPNDFQEPYAVVV LLEKDLVLIDL AQN : 382

TOM-1 : GHPVIESPHAMN IHESPVTCMAY SDCPLDLIGAL TLVGT KQRNKEFSARS WPVTGGLGRECATGHQ ELVVTGHKDG : 439  
 hTomosyn : GYPIFENPYPLS IHESPVTCCEYFADCPVDL I PALYSVGARQKRQGYSKKEWP INGGNWGLGAQSYPEIIITGHADG : 458  
 rTomosynS : GYPIFENPYPLS IHESPVTCCEYFADCPVDL I PALYSVGARQKRQGYSKKEWP INGGNWGLGAQSYPEIIITGHADG : 459

TOM-1 : SLKFWQETG EHLQILYK LKSSSHFERL ---EEMETS ---DKVSHAVKYI ELCL ESRQLLVAGISGQV TLFRTKQE- : 509  
 hTomosyn : SVKFWDASAITLQVLYK LKTSKVFEKSRNKDDRPN TDI VDEDPYAIQ IISWCPE SRMLCIAGVSAHV IYRFSKQEV : 535  
 rTomosynS : SIKFWDASAITLQVLYK LKTSKVFEKSRNKDDRQNTDI VDEDPYAIQ IISWCPE SRMLCIAGVSAHV IYRFSKQEV : 536

TOM-1 : ICGTI AVVNIPL L L GNLSSNL PNNDFDKS PVPNGP GKEIRRQRKIVSRE STN SLDTS DSGDERIVPFKVRGAPVKRPP : 586  
 hTomosyn : ITEVI PML EVRLLYE INDVETPEGEQPPPL TPVGGSNP QIP PQSHPTSS -SSSDGLRDNV PCLKVKNSPLKQSP : 611  
 rTomosynS : VTEVI PML EVRLLYE INDVETPEGEQPPPLS TPVGSSTS QIP PQSHPTSS -SSSDGLRDNV PCLKRVLPSTARSN : 612

TOM-1 : GFVPELACFPV PWHSHAKV -DQIT IICLNSSYGI I AIGTSSGLALVD T TQCALIYSWITN ELYGSDPTPAIQLSMQLS : 662  
 hTomosyn : GYQTELVIQ L VVVGGEPPQ QITS LAVNSSYGL -VVFNGNCGI AMVDYI LQKAVLNLN LSTIELYGSN -DPYRREPRSPR : 686  
 rTomosynS : TSRTQDS -DFYILGNLVL F PVSRYSCMTTYDL T VVVFNGNCGI AMVDYI LQKAVLNLN LSTIELYGSN -DPYRREPRSPR : 687

TOM-1 : DAASPLESPI S-----LEA EKRIISEQKQRS F DAR ---RPQL EKTQSVVENGSL SRGDSQRES : 717  
 hTomosyn : KSRQPSGAGLC DIS EGT VVPEDRCKSPTS ------AKMSRKL SLPTD : 727  
 rTomosynS : KSRQPSGAGLC DITEGT VVPEDRCKSPTS GSSSEHNSDD EQKVNNFIEK VKTQSRK ESKMVASDL AKMSRKL SLPTD : 764

# Supplemental Figure 2 (continued)

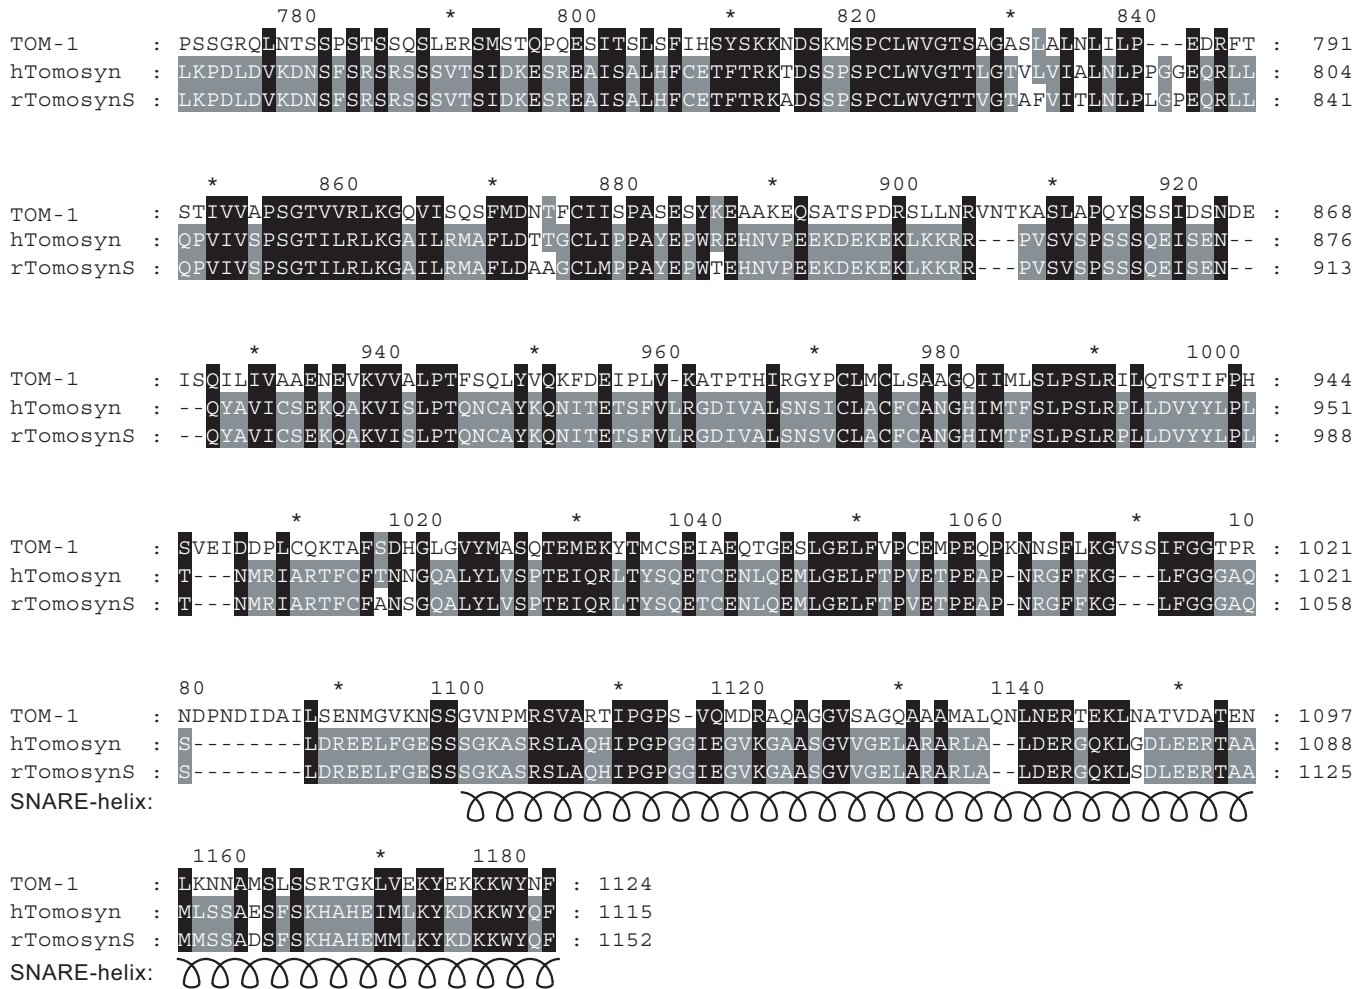

**Figure S2.** Alignment of TOM-1 to human and rat Tomosyn. Sequences of human and mouse tomosyn were downloaded from Ensembl ([www.ensembl.org/](http://www.ensembl.org/)), accession numbers ENSP00000179882 and ENSRNOP00000018806 respectively. The multiple sequence alignment was performed using T-Coffee (<http://www.ch.embnet.org/software/TCoffee.html>). Alignment output was produced using GeneDoc ([www.psc.edu/biomed/genedoc](http://www.psc.edu/biomed/genedoc)).
