# Supplementary material for: Using Microarrays to Facilitate Positional Cloning: Identification of Tomosyn as an Inhibitor of Neurosecretion
Source: PubMed Central journal article supplement (PMC1183521; doi:10.1371/journal.pgen.0010002), 2005-07-25
Supplement: pgen.0010002.st001.pdf [file pgen.0010002.st001.pdf]

# Supplemental Table 1

| Gene     | Missense | Nonsense | Total | % NMD | Source                   |
|----------|----------|----------|-------|-------|--------------------------|
| aap-1    |          | 1        | 1     | 100%  | Wormbase                 |
| acy-1    | 17       |          | 17    | 0%    | Wormbase                 |
| aex-1    |          | 7        | 7     | 100%  | Doi, 2002                |
| air-1    | 2        |          | 2     | 0%    | Wormbase                 |
| akt-1    | 2        |          | 2     | 0%    | Wormbase                 |
| anc-1    |          | 1        | 1     | 100%  | Wormbase                 |
| aph-1    | 2        | 5        | 7     | 71%   | Wormbase                 |
| bam-2    | 2        | 1        | 3     | 33%   | Wormbase                 |
| bas-1    |          | 3        | 3     | 100%  | Wormbase                 |
| bre-2    | 1        | 1        | 2     | 50%   | Wormbase                 |
| bre-4    | 1        | 1        | 2     | 50%   | Wormbase                 |
| bre-5    | 1        | 1        | 2     | 50%   | Wormbase                 |
| cam-1    | 1        | 2        | 3     | 67%   | Wormbase                 |
| cat-2    |          | 1        | 1     | 100%  | Wormbase                 |
| cat-4    | 1        |          | 1     | 0%    | Wormbase                 |
| cdc-25.1 | 2        |          | 2     | 0%    | Wormbase                 |
| cdf-1    |          | 1        | 1     | 100%  | Wormbase                 |
| cdk-4    | 1        | 2        | 3     | 67%   | Wormbase                 |
| cdk-7    | 1        |          | 1     | 0%    | Wormbase                 |
| cdl-1    | 1        | 1        | 2     | 50%   | Wormbase                 |
| ced-1    | 8        | 4        | 12    | 33%   | Wormbase                 |
| ced-10   | 2        |          | 2     | 0%    | Wormbase                 |
| ced-12   |          | 7        | 7     | 100%  | Wormbase                 |
| ced-2    |          | 3        | 3     | 100%  | Wormbase                 |
| ced-3    | 1        |          | 1     | 0%    | Wormbase                 |
| ceh-36   | 1        | 3        | 4     | 75%   | Wormbase                 |
| ceh-37   | 1        |          | 1     | 0%    | Wormbase                 |
| cfi-1    |          | 1        | 1     | 100%  | Wormbase                 |
| che-1    | 5        | 6        | 11    | 55%   | Wormbase                 |
| che-3    |          | 1        | 1     | 100%  | Wormbase                 |
| chk-2    | 1        | 1        | 2     | 50%   | Wormbase                 |
| cog-1    | 1        |          | 1     | 0%    | Wormbase                 |
| crt-1    |          | 2        | 2     | 100%  | Wormbase                 |
| ctb-1    | 1        |          | 1     | 0%    | Wormbase                 |
| cup-5    | 2        | 1        | 3     | 33%   | Wormbase                 |
| cyd-1    |          | 1        | 1     | 100%  | Wormbase                 |
| cye-1    |          | 2        | 2     | 100%  | Wormbase                 |
| cyk-3    |          | 2        | 2     | 100%  | Wormbase                 |
| cyk-4    | 7        |          | 7     | 0%    | Wormbase                 |
| daf-2    | 12       |          | 12    | 0%    | Wormbase                 |
| dcr-1    |          | 2        | 2     | 100%  | Wormbase                 |
| deg-3    | 11       |          | 11    | 0%    | Wormbase                 |
| dep-1    |          | 1        | 1     | 100%  | Wormbase                 |
| dgk-1    | 1        | 2        | 3     | 67%   | Nurrih et al 99          |
| dim-1    |          | 2        | 2     | 100%  | Wormbase                 |
| dpy-11   | 7        | 4        | 11    | 36%   | Wormbase                 |
| dpy-17   | 1        | 2        | 3     | 67%   | Wormbase                 |
| dpy-19   | 3        | 1        | 4     | 25%   | Wormbase                 |
| dpy-22   |          | 3        | 3     | 100%  | Wormbase                 |
| dyb-1    |          | 1        | 1     | 100%  | Wormbase                 |
| dyn-1    | 1        |          | 1     | 0%    | Wormbase                 |
| eat-16   | 2        | 1        | 3     | 33%   | Hajdu-Cronin et al, 1999 |
| eat-18   | 1        | 1        | 2     | 50%   | Wormbase                 |
| eat-2    | 6        | 1        | 7     | 14%   | Wormbase                 |
| eff-1    | 2        |          | 2     | 0%    | Wormbase                 |

# Supplemental Table 1

| Gene    | Missense | Nonsense | Total | % NMD | Source                    |
|---------|----------|----------|-------|-------|---------------------------|
| egl-13  | 2        | 1        | 3     | 33%   | Wormbase                  |
| egl-15  | 12       | 7        | 19    | 37%   | Wormbase                  |
| egl-18  |          | 3        | 3     | 100%  | Wormbase                  |
| egl-20  | 3        |          | 3     | 0%    | Wormbase                  |
| egl-21  | 1        |          | 1     | 0%    | Wormbase                  |
| egl-3   | 4        |          | 4     | 0%    | Wormbase                  |
| egl-4   | 2        | 5        | 7     | 71%   | Wormbase                  |
| egl-46  |          | 1        | 1     | 100%  | Wormbase                  |
| egl-8   |          | 1        | 1     | 100%  | Wormbase                  |
| ego-1   | 4        | 1        | 5     | 20%   | Wormbase                  |
| elo-1   | 2        |          | 2     | 0%    | Wormbase                  |
| eor-1   | 1        | 1        | 2     | 50%   | Wormbase                  |
| eor-2   |          | 4        | 4     | 100%  | Wormbase                  |
| epi-1   | 4        | 2        | 6     | 33%   | Wormbase                  |
| eri-1   |          | 1        | 1     | 100%  | Wormbase                  |
| evl-14  |          | 1        | 1     | 100%  | Wormbase                  |
| evl-20  |          | 1        | 1     | 100%  | Wormbase                  |
| exc-5   |          | 1        | 1     | 100%  | Wormbase                  |
| exp-1   | 4        |          | 4     | 0%    | Wormbase                  |
| fat-1   |          | 2        | 2     | 100%  | Wormbase                  |
| fat-2   | 1        |          | 1     | 0%    | Wormbase                  |
| fat-3   | 2        |          | 2     | 0%    | Wormbase                  |
| fat-4   | 3        | 1        | 4     | 25%   | Wormbase                  |
| fbf-2   |          | 1        | 1     | 100%  | Wormbase                  |
| fog-1   | 13       | 5        | 18    | 28%   | Wormbase                  |
| fsn-1   |          | 1        | 1     | 100%  | Wormbase                  |
| fzr-1   | 1        |          | 1     | 0%    | Wormbase                  |
| fzy-1   | 1        |          | 1     | 0%    | Wormbase                  |
| gad-1   | 1        |          | 1     | 0%    | Wormbase                  |
| gem-4   | 3        |          | 3     | 0%    | Wormbase                  |
| gld-2   | 1        |          | 1     | 0%    | Wormbase                  |
| glp-1   | 3        |          | 3     | 0%    | Wormbase                  |
| goa-1   | 1        | 1        | 2     | 50%   | Robatzek and Thomas, 2000 |
| gon-2   | 3        |          | 3     | 0%    | Wormbase                  |
| gon-4   |          | 4        | 4     | 100%  | Wormbase                  |
| gpa-16  | 1        |          | 1     | 0%    | Wormbase                  |
| gpb-2   | 6        | 2        | 8     | 25%   | Robatzek, 2001            |
| hda-1   | 1        |          | 1     | 0%    | Wormbase                  |
| hen-1   | 1        |          | 1     | 0%    | Wormbase                  |
| hid-1   | 2        | 1        | 3     | 33%   | Wormbase                  |
| him-10  | 1        |          | 1     | 0%    | Wormbase                  |
| hlh-2   | 2        |          | 2     | 0%    | Wormbase                  |
| hlh-8   | 1        |          | 1     | 0%    | Wormbase                  |
| hse-5   | 1        |          | 1     | 0%    | Wormbase                  |
| hst-6   | 1        | 1        | 2     | 50%   | Wormbase                  |
| hus-1   | 1        |          | 1     | 0%    | Wormbase                  |
| inx-3   |          | 1        | 1     | 100%  | Wormbase                  |
| inx-6   | 1        |          | 1     | 0%    | Wormbase                  |
| isp-1   | 1        |          | 1     | 0%    | Wormbase                  |
| kin-29  | 1        |          | 1     | 0%    | Wormbase                  |
| ksr-2   |          | 1        | 1     | 100%  | Wormbase                  |
| let-23  | 9        | 1        | 10    | 10%   | Aroian, 1994              |
| let-268 | 3        |          | 3     | 0%    | Wormbase                  |
| let-363 |          | 3        | 3     | 100%  | Wormbase                  |
| let-413 | 1        | 1        | 2     | 50%   | Wormbase                  |

# Supplemental Table 1

| Gene    | Missense | Nonsense | Total | % NMD | Source        |
|---------|----------|----------|-------|-------|---------------|
| let-418 |          | 3        | 3     | 100%  | Wormbase      |
| let-502 | 9        |          | 9     | 0%    | Wormbase      |
| let-767 | 1        |          | 1     | 0%    | Wormbase      |
| let-99  |          | 3        | 3     | 100%  | Wormbase      |
| lin-1   | 1        |          | 1     | 0%    | Wormbase      |
| lin-10  | 1        | 9        | 10    | 90%   | Whitfield, 98 |
| lin-13  | 3        | 3        | 6     | 50%   | Wormbase      |
| lin-14  |          | 2        | 2     | 100%  | Wormbase      |
| lin-23  | 1        |          | 1     | 0%    | Wormbase      |
| lin-26  | 3        | 1        | 4     | 25%   | Wormbase      |
| lin-31  | 3        | 5        | 8     | 63%   | Wormbase      |
| lin-45  | 9        | 3        | 12    | 25%   | Wormbase      |
| lin-48  | 3        |          | 3     | 0%    | Wormbase      |
| lin-49  | 1        | 2        | 3     | 67%   | Wormbase      |
| lin-5   | 2        | 2        | 4     | 50%   | Wormbase      |
| lin-52  | 1        | 1        | 2     | 50%   | Wormbase      |
| lin-7   |          | 3        | 3     | 100%  | Simske, 96    |
| lin-9   | 1        | 2        | 3     | 67%   | Wormbase      |
| lip-1   | 2        |          | 2     | 0%    | Wormbase      |
| lon-1   | 7        | 3        | 10    | 30%   | Wormbase      |
| lon-3   |          | 3        | 3     | 100%  | Wormbase      |
| lrs-2   |          | 1        | 1     | 100%  | Wormbase      |
| mab-23  | 1        |          | 1     | 0%    | Wormbase      |
| mat-2   | 7        |          | 7     | 0%    | Wormbase      |
| mat-3   | 12       |          | 12    | 0%    | Wormbase      |
| mbk-2   |          | 3        | 3     | 100%  | Wormbase      |
| mec-6   | 1        | 3        | 4     | 75%   | Wormbase      |
| mes-1   | 2        | 3        | 5     | 60%   | Wormbase      |
| mes-3   | 4        | 1        | 5     | 20%   | Wormbase      |
| mes-4   |          | 1        | 1     | 100%  | Wormbase      |
| mig-23  | 2        | 1        | 3     | 33%   | Wormbase      |
| mre-11  | 1        |          | 1     | 0%    | Wormbase      |
| mtm-6   | 1        | 1        | 2     | 50%   | Wormbase      |
| mtm-9   |          | 1        | 1     | 100%  | Wormbase      |
| mua-6   | 1        | 1        | 2     | 50%   | Wormbase      |
| mut-14  | 1        |          | 1     | 0%    | Wormbase      |
| nmy-1   | 2        | 1        | 3     | 33%   | Wormbase      |
| npr-1   | 4        | 1        | 5     | 20%   | Wormbase      |
| nsy-1   |          | 3        | 3     | 100%  | Wormbase      |
| nuc-1   |          | 3        | 3     | 100%  | Wormbase      |
| odr-2   | 2        | 1        | 3     | 33%   | Wormbase      |
| odr-7   | 2        |          | 2     | 0%    | Wormbase      |
| oma-1   | 4        | 2        | 6     | 33%   | Wormbase      |
| oma-2   | 1        |          | 1     | 0%    | Wormbase      |
| ooc-3   |          | 1        | 1     | 100%  | Wormbase      |
| ooc-5   | 1        | 2        | 3     | 67%   | Wormbase      |
| osm-5   | 1        | 3        | 4     | 75%   | Wormbase      |
| pag-3   | 1        | 1        | 2     | 50%   | Wormbase      |
| par-5   | 3        |          | 3     | 0%    | Wormbase      |
| pat-4   |          | 1        | 1     | 100%  | Wormbase      |
| pat-6   |          | 2        | 2     | 100%  | Wormbase      |
| pen-2   |          | 6        | 6     | 100%  | Wormbase      |
| pop-1   | 2        |          | 2     | 0%    | Wormbase      |
| pqe-1   | 2        | 4        | 6     | 67%   | Wormbase      |
| pry-1   |          | 2        | 2     | 100%  | Wormbase      |

# Supplemental Table 1

| Gene    | Missense | Nonsense | Total | % NMD | Source         |
|---------|----------|----------|-------|-------|----------------|
| rde-4   |          | 1        | 1     | 100%  | Wormbase       |
| ref-1   | 1        |          | 1     | 0%    | Wormbase       |
| rfl-1   | 1        |          | 1     | 0%    | Wormbase       |
| ric-8   | 2        |          | 2     | 0%    | Wormbase       |
| rme-1   | 3        | 1        | 4     | 25%   | Wormbase       |
| rpm-1   |          | 4        | 4     | 100%  | Wormbase       |
| sad-1   | 3        | 1        | 4     | 25%   | Wormbase       |
| scc-3   |          | 1        | 1     | 100%  | Wormbase       |
| sec-23  |          | 1        | 1     | 100%  | Wormbase       |
| sel-12  |          | 2        | 2     | 100%  | Wormbase       |
| sel-7   | 2        | 2        | 4     | 50%   | Wormbase       |
| sel-8   |          | 1        | 1     | 100%  | Wormbase       |
| sem-4   | 1        | 2        | 3     | 67%   | Wormbase       |
| sem-5   |          | 1        | 1     | 100%  | Wormbase       |
| sid-1   | 7        | 2        | 9     | 22%   | Wormbase       |
| slo-1   | 3        | 4        | 7     | 57%   | Wang, 2001     |
| sma-9   |          | 2        | 2     | 100%  | Wormbase       |
| smg-5   |          | 3        | 3     | 100%  | Wormbase       |
| smu-1   | 1        | 2        | 3     | 67%   | Wormbase       |
| snb-1   | 3        | 1        | 4     | 25%   | Nonet, 1998    |
| soc-1   |          | 12       | 12    | 100%  | Wormbase       |
| sol-1   | 1        | 1        | 2     | 50%   | Wormbase       |
| sos-1   | 3        |          | 3     | 0%    | Wormbase       |
| spd-5   | 1        |          | 1     | 0%    | Wormbase       |
| spe-39  |          | 3        | 3     | 100%  | Wormbase       |
| spe-6   | 18       | 1        | 19    | 5%    | Wormbase       |
| spn-4   | 2        |          | 2     | 0%    | Wormbase       |
| spr-1   |          | 1        | 1     | 100%  | Wormbase       |
| spr-4   |          | 1        | 1     | 100%  | Wormbase       |
| spr-5   | 2        | 2        | 4     | 50%   | Wormbase       |
| sqt-2   | 2        |          | 2     | 0%    | Wormbase       |
| sqv-1   | 3        |          | 3     | 0%    | Wormbase       |
| sqv-2   | 1        | 1        | 2     | 50%   | Wormbase       |
| sqv-4   | 2        |          | 2     | 0%    | Wormbase       |
| sqv-6   |          | 1        | 1     | 100%  | Wormbase       |
| sup-10  | 2        | 2        | 4     | 50%   | Wormbase       |
| sup-9   | 49       | 16       | 65    | 25%   | Wormbase       |
| syd-1   |          | 2        | 2     | 100%  | Wormbase       |
| syp-2   |          | 1        | 1     | 100%  | Wormbase       |
| tax-6   | 1        | 1        | 2     | 50%   | Kuhara, 2002   |
| tbb-2   | 3        |          | 3     | 0%    | Wormbase       |
| tbg-1   | 1        |          | 1     | 0%    | Wormbase       |
| tpa-1   | 26       | 17       | 43    | 40%   | Wormbase       |
| ttx-1   | 1        |          | 1     | 0%    | Wormbase       |
| ttx-3   | 1        | 1        | 2     | 50%   | Wormbase       |
| twk-18  | 3        |          | 3     | 0%    | Wormbase       |
| ubc-18  | 1        |          | 1     | 0%    | Wormbase       |
| unc-10  |          | 5        | 5     | 100%  | Koushika, 2001 |
| unc-103 | 3        | 1        | 4     | 25%   | Wormbase       |
| unc-119 |          | 2        | 2     | 100%  | Wormbase       |
| unc-16  | 1        | 2        | 3     | 67%   | Wormbase       |
| unc-17  | 12       |          | 12    | 0%    | Wormbase       |
| unc-18  | 2        | 3        | 5     | 60%   | Sassa, 99      |
| unc-2   | 2        | 5        | 7     | 71%   | Wormbase       |
| unc-26  | 4        | 4        | 8     | 50%   | Wormbase       |

# Supplemental Table 1

| Gene         | Missense   | Nonsense   | Total      | % NMD      | Source           |
|--------------|------------|------------|------------|------------|------------------|
| unc-27       |            | 3          | 3          | 100%       | Wormbase         |
| unc-37       | 2          | 1          | 3          | 33%        | Wormbase         |
| unc-38       | 2          |            | 2          | 0%         | Wormbase         |
| unc-43       | 8          | 3          | 11         | 27%        | Reiner et al, 99 |
| unc-5        | 1          | 6          | 7          | 86%        | Wormbase         |
| unc-59       | 2          |            | 2          | 0%         | Wormbase         |
| unc-61       |            | 2          | 2          | 100%       | Wormbase         |
| unc-62       |            | 1          | 1          | 100%       | Wormbase         |
| unc-71       | 14         | 6          | 20         | 30%        | Wormbase         |
| unc-78       | 3          | 1          | 4          | 25%        | Wormbase         |
| vab-10       | 2          |            | 2          | 0%         | Wormbase         |
| vab-9        |            | 1          | 1          | 100%       | Wormbase         |
| vps-34       | 2          | 3          | 5          | 60%        | Wormbase         |
| wee-1.3      | 9          | 2          | 11         | 18%        | Wormbase         |
| zag-1        |            | 3          | 3          | 100%       | Wormbase         |
| zen-4        | 5          |            | 5          | 0%         | Wormbase         |
| zyg-1        | 2          | 1          | 3          | 33%        | Wormbase         |
| zyg-12       | 2          |            | 2          | 0%         | Wormbase         |
| zyg-8        | 7          | 2          | 9          | 22%        | Wormbase         |
| <b>Total</b> | <b>559</b> | <b>384</b> | <b>943</b> | <b>41%</b> |                  |
